# Supplementary material for: Highly Flexible and Conductive Printed Graphene for Wireless Wearable Communications Applications
Source: PubMed Central journal article supplement (PMC4682142; doi:10.1038/srep18298), 2015-12-17
Supplement: srep18298-s1.pdf [file srep18298-s1.pdf]

# Highly Flexible and Conductive Printed Graphene for Wireless Wearable Communications Applications (Supplementary Information)

Xianjun Huang,<sup>1</sup> Ting Leng,<sup>1</sup> Mengjian Zhu,<sup>2</sup> Xiao Zhang,<sup>1</sup> JiaCing Chen,<sup>3</sup> KuoHsin Chang,<sup>3</sup> Mohammed Aqeeli,<sup>1</sup> Andre K. Geim,<sup>4</sup> Kostya S. Novoselov,<sup>2</sup> Zhirun Hu,<sup>1,\*</sup>

\*Correspondence: Zhirun Hu ([z.hu@manchester.ac.uk](mailto:z.hu@manchester.ac.uk))

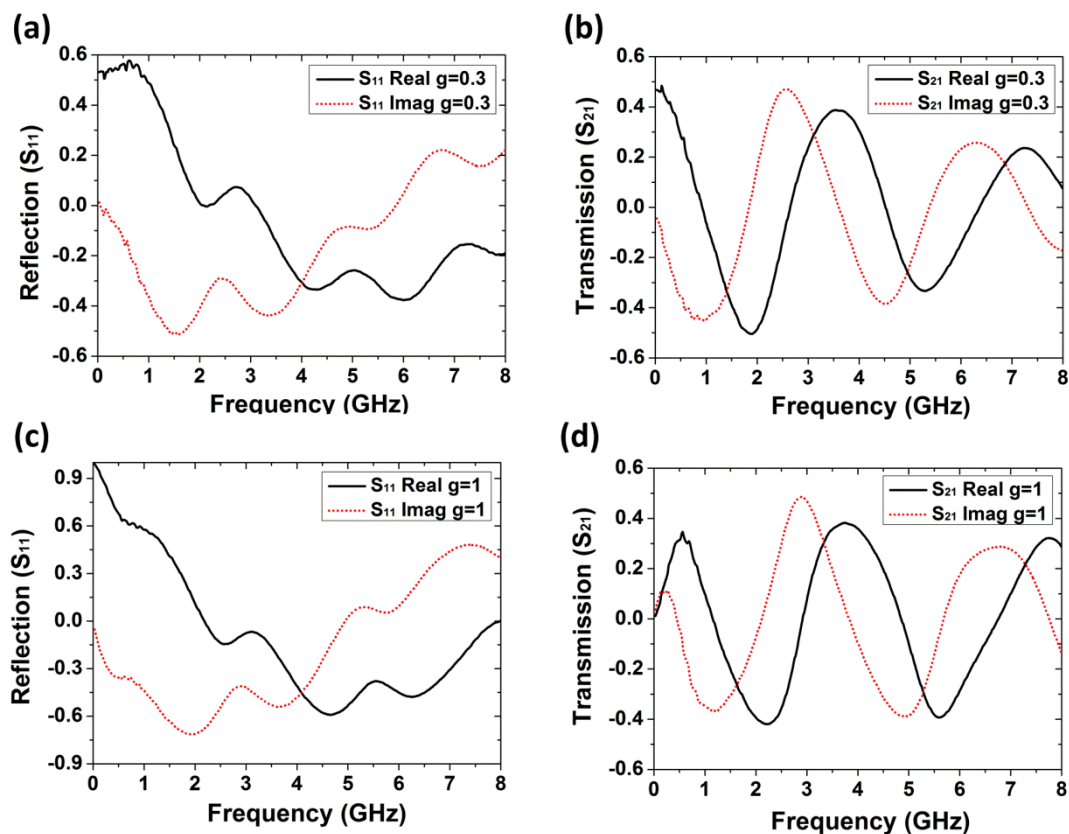

**Supplementary Figure S1** Measured S parameters of slot transmission line. (a) Real and imaginary part of  $S_{11}$  when  $g=0.3\text{mm}$ , (b) Real and imaginary part of  $S_{21}$  when  $g=0.3\text{mm}$ , (c) Real and imaginary part of  $S_{11}$  when  $g=1\text{mm}$ , (b) Real and imaginary part of  $S_{21}$  when  $g=1\text{mm}$ .

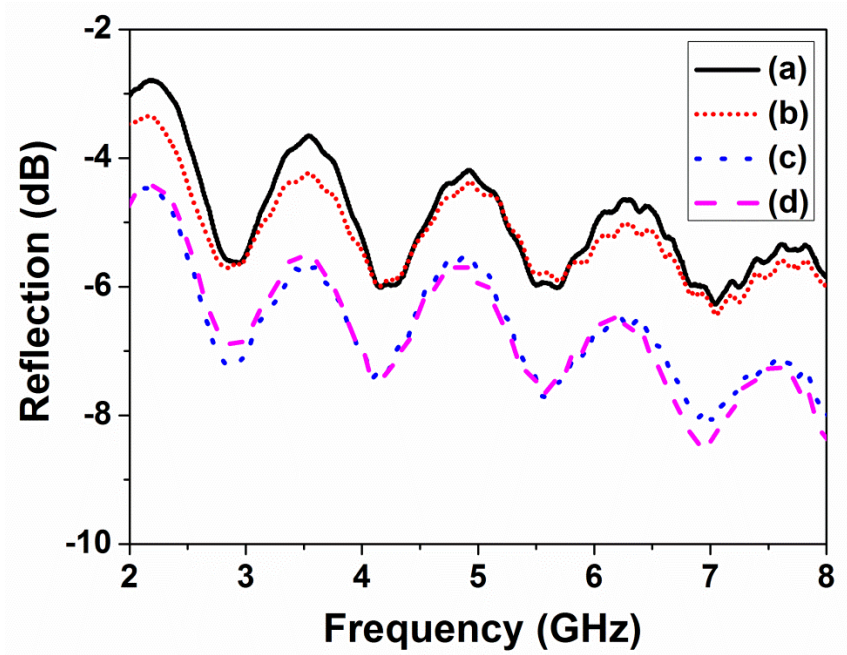

**Supplementary Figure S2** Reflections of Un-bended (a), bended (b, c) and twisted (d) slot lines.

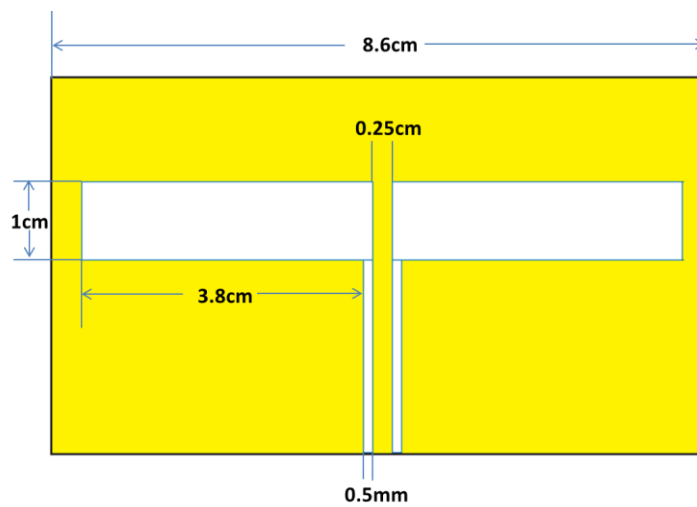

**Supplementary Figure S3** CWP fed slot antenna layout parameters

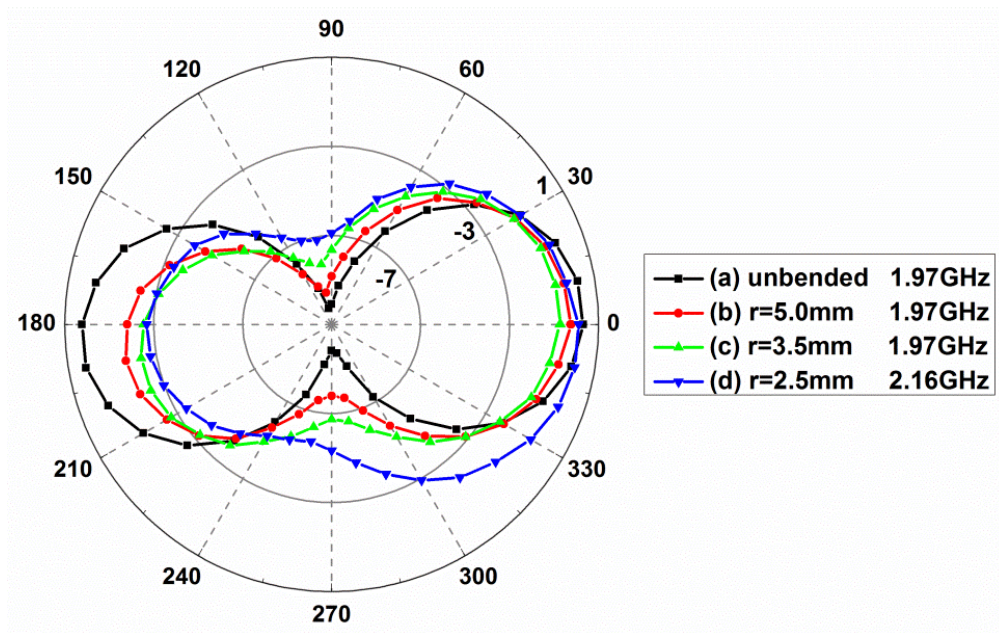

**Supplementary Figure S4** Comparison of measured radiation pattern at 1.97GHz of case (a)-(c), and radiation pattern at 2.16GHz of case (d). It can be seen that in case (d)  $r = 2.5\text{cm}$ , at 2.16GHz, the maximum gain frequency point, the radiation pattern similar with other cases (a)-(c).

## Reference

<sup>1</sup> Nithisopa, K., Nakasuwan, J., Songthanapitak, N., Anantrasirichai, N., & Wakabayashi, T. (2007). Design CPW fed slot antenna for wideband applications.
